# Supplementary material for: TACC2 (transforming acidic coiled‐coil protein 2) in breast carcinoma as a potent prognostic predictor associated with cell proliferation
Source: PubMed Central journal article supplement (PMC4971925; doi:10.1002/cam4.736), 2016-06-22

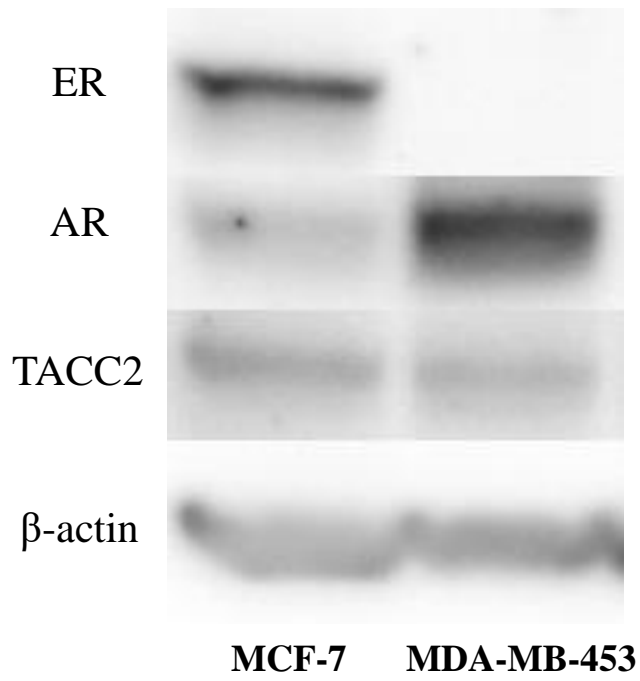

Supplement: CAM4-5-1973-s001.pdf [file CAM4-5-1973-s001.pdf]
